# 1 Comparing the prioritisation of items and feature- 2 dimensions in visual working memory

3

4 Jasper E. Hajonides<sup>1,2</sup>, Freek van Ede<sup>1</sup>, Mark G. Stokes<sup>2</sup>, Anna C. Nobre<sup>1,2</sup>

5

6 <sup>1</sup> *Oxford Centre for Human Brain Activity, Wellcome Centre for Integrative  
7 Neuroimaging, Department of Psychiatry, University of Oxford, UK.*

8 <sup>2</sup> *Department of Experimental Psychology, University of Oxford, UK.*

9

10

## 11 **Abstract**

12 Selective attention can be directed not only to external sensory inputs, but also to  
13 internal sensory representations held within visual working memory (VWM). To date,  
14 this has been studied predominantly following retrospective cues directing attention to  
15 particular items, or their locations in memory. In addition to item-level attentional  
16 prioritisation, recent studies have shown that selectively attending to feature  
17 dimensions in VWM can also improve memory recall performance. However, no study  
18 to date has directly compared item-based and feature-based attention in VWM, nor  
19 their neural bases. Here, we compared the benefits of retrospective cues (retro-cues)  
20 that were directed either at a multi-feature item or at a feature-dimension that was  
21 shared between two spatially segregated items. Behavioural results revealed  
22 qualitatively similar attentional benefits in both recall accuracy and response time, but  
23 also showed that cueing benefits were larger following item cues. Concurrent EEG  
24 measurements further revealed a similar attenuation of posterior alpha oscillations  
25 following both item and feature retro-cues when compared to non-informative, neutral  
26 retro-cues. We argue that attention can act flexibly to prioritise the most relevant  
27 information – at either the item or the feature-level – to optimise ensuing memory-  
28 based task performance, and we discuss the implications of the observed commonalities  
29 and differences between item-level and feature-level prioritisation in VWM.

30

31

## 32 Introduction

33 Visual working memory (VWM) provides a means to maintain relevant information  
34 independently of continued visual input, to guide adaptive behaviour (Baddeley, 1992,  
35 2003). Because VWM has limited capacity and/or resources (Bays & Husain, 2008; Luck  
36 & Vogel, 1997; Vogel, Woodman, & Luck, 2001; Zhang & Luck, 2008), it is essential to  
37 distribute memory processes efficiently to complete tasks at hand effectively. Over the  
38 past decade, it has become increasingly clear that VWM is more flexible than originally  
39 thought. Focused attention continues to prioritise and select contents maintained in  
40 VWM as goals and predictions about goals change (Griffin & Nobre, 2003; Kuo, Stokes,  
41 & Nobre, 2011; Landman, Spekreijse, & Lamme, 2003; Souza & Oberauer, 2016). To bring  
42 about behavioural benefits, attention-related modulatory signals must interact with  
43 mnemonic information that is available within VWM. Thus, by studying what forms of  
44 attention confer benefits to VWM also provides insight about the format of information  
45 held in VWM.

46  
47 In perceptual attention, research has revealed a multitude of representational formats  
48 available for modulation. These include spatial locations, objects, features, semantic  
49 associations, time intervals, and likely more (for an overview, see e.g., Nobre, 2018).  
50 Whether the same diversity of representational formats is available in VWM is an  
51 important and informative question. Information in VWM results from attentional  
52 filtering of incoming sensory processing (Vogel, McCollough, & Machizawa, 2005).  
53 Thus, the representational information might be kept in an altered, more compact  
54 format. For example, it has been suggested that the primary representational unit of  
55 VWM involves integrated (feature-bound) items (Luck & Vogel, 1997; Vogel et al., 2001).  
56 Under this framework, one might expect that the primary target for attentional  
57 selection in visual working memory should be at the level of individual items.  
58 Accordingly, most studies looking at the role of attention in VWM to date have used  
59 spatial retro-cues, linked to item-based representations, and have shown clear benefits  
60 (e.g. Griffin & Nobre, 2003; Landman et al., 2003; Souza & Oberauer, 2016).

61  
62 At the same time, recent studies have demonstrated that attention can also facilitate  
63 behaviour when directed to *feature dimensions* that are shared among multiple items in  
64 VWM (Niklaus, Nobre, & Van Ede, 2017; Park, Sy, Hong, & Tong, 2017; Pilling & Barrett,  
65 2016; Ye, Hu, Ristaniemi, Gendron, & Liu, 2016; Yu & Shim, 2017). It remains unclear,  
66 however, how such effects of feature-based attention compare to item-based attention  
67 in VWM, as no study has directly compared these two forms of attentional facilitation  
68 in VWM. Here we directly compare these two types of attentional facilitation.

69  
70 In addition to comparing item and feature-based attention at the level of behavioural  
71 performance, we examined their effects on an electrophysiological marker linked to  
72 attention in VWM: the attenuation of posterior alpha oscillations. Several studies have  
73 revealed that item-based prioritisation in VWM is associated with the attenuation of  
74 alpha oscillations in posterior brain areas, suggesting modulation of visual areas  
75 involved in representing the mnemonic items (Myers, Walther, Wallis, Stokes, & Nobre,  
76 2015; Poch, Capilla, Hinojosa, & Campo, 2017; van Ede, 2018; van Ede, Niklaus, & Nobre,  
77 2017; Wallis, Stokes, Cousijn, Woolrich, & Nobre, 2015; Wolff, Jochim, Akyürek, &  
78 Stokes, 2017). It remains unclear whether alpha attenuation also occurs during the

79 attentional prioritisation of feature dimensions that are shared across multiple items  
80 held in VWM.

81  
82 In the current study, we therefore compared and contrasted behavioural and neural  
83 effects of internal shifts of attention to multi-feature items and to single feature  
84 dimensions that were shared across multiple items. Through the behavioural data, the  
85 aim was to test whether there is a clear primacy of the object-level information in VWM.  
86 If the representational format in VWM organises items as integrated objects, this should  
87 also be the primary level at which attention can operate. Accordingly, benefits from  
88 item-directing retro-cues should be substantially larger. If, however, attention has  
89 similar access to multiple levels of information in VWM, then retro-cueing benefits for  
90 feature dimensions and individual items may be similar. By recording EEG and  
91 measuring alpha oscillations, we further tested whether a similar alpha modulation  
92 occurs when attention is directed to a cued item or to a visual feature dimension that is  
93 distributed across multiple items held in VWM.

94  
95 To address these questions, we used a task in which participants were presented with  
96 two Gabor gratings, each of which contained both colour and orientation information.  
97 On half of the blocks, participants were presented with an item-directing retro-cue and  
98 on the other half with a feature-dimension-directing retro-cue. Both blocks contained  
99 neutral (uninformative) retro-cues, against which we compared the effects of both types  
100 of informative retro-cues. We observed qualitatively comparable retro-cueing effects,  
101 though benefits following item cues were larger. Both effects were accompanied by  
102 similar alpha attenuation following the cues, and both item- and feature-level benefits  
103 on behaviour were highly correlated across participants.

104

## 105 **Methods**

### 106 *Participants*

107 The study was approved by the Central University Research Ethics Committee of the  
108 University of Oxford. Thirty-two healthy volunteers (19 female; mean age 28.3; range 18-  
109 35) took part. Participants had normal or corrected-to-normal vision and were not  
110 colour blind. Participants provided written informed consent before participating in the  
111 study and were paid £15 per hour. Data from two participants were excluded from  
112 analysis, one for terminating the experiment early and the other due to hardware failure.

113

### 114 *Experimental set-up & stimuli*

115 Participants were seated in front of a 23-inch monitor (1920 × 1080, 100 Hz). Stimuli were  
116 generated using Psychophysics Toolbox version 3.0.11 (Brainard, 1997) in MATLAB 2014b  
117 (MathWorks, Natick, MA). Head position was set at 90 cm from the monitor, and  
118 participants used a chinrest. The stimuli consisted of luminance-defined sinusoidal  
119 Gabor gratings generated in MATLAB 2014b. Forty-eight evenly spaced colours were  
120 drawn from a circle in CIE L\*a\*b colour space (center at L = 54, a = 18, b = -8, radius  
121 =59). Gratings were presented using one of 48 different orientations (3.75 to 180 degrees  
122 in steps of 3.75) and 48 different colours.

123

### 124 *Task & design*

125 Participants performed a visual working memory task (**Figure 1**) in which they were  
126 asked to reproduce the colour or orientation of one out of two memory items at the end  
127 of a memory delay of 2.3 seconds. At the start of each trial, two Gabor stimuli with a  
128 radius of 2.2 degrees positioned left and right from fixation (centred 3.1 degrees of visual  
129 angle) were presented simultaneously for 300 ms. Participants were instructed to  
130 remember the colour and the orientation of both items. At the end of the trial, they  
131 were probed to report the orientation or the colour of one of the items. The to-be-  
132 reported feature was indicated with the probe circle that was either a colour wheel  
133 (colour report) or a white wheel (orientation report), while the to-be-reported item was  
134 indicated by the location of the probe circle (left/right, corresponding to the original  
135 location of the probed memory item). Orientation and colour values varied  
136 independently between the two items, with the constraint that no two equal  
137 orientations or colours were presented on the same trial. Colours and orientations were  
138 counterbalanced so that each was presented equally often across trials.

139

140 Two events occurred during the memory delay: first a retro-cue appeared, which could  
141 provide information about the item or feature dimension that would be probed. Second,  
142 700 ms after the retro-cue offset, an irrelevant ‘distractor’ stimulus was presented that  
143 contained either colour or orientation information (**Figure 1** for examples).

144

145 On even runs, informative retro-cues indicated the location (left, ‘L’, or right, ‘R’) of the  
146 item that would be probed at the end of the trial, without giving information about what  
147 feature would be probed. On odd runs, informative retro-cues indicated the feature  
148 dimension to be probed (colour, ‘C’, or orientation, ‘O’), without giving information  
149 about what item would be probed. We thus cued either a single item that contained two  
150 relevant features, or a single feature-dimension that was shared between two relevant  
151 items. When informative, the retro-cue was always 100% valid. Both runs also contained  
152 50% non-informative neutral cues (‘X’) that provided no information about what item  
153 or feature would be probed at the end of the trial. Participants were encouraged to use  
154 the informative retro-cues to select the relevant item or feature dimension.

155

156 Following another fixation period of 700 ms (after the retro-cue), a bilateral distractor  
157 was presented for 100 ms. The distractor consisted of either a single colour or a black-  
158 and-white oriented Gabor grating. Sixteen colours and 16 orientations were used (11.25  
159 to 180 degrees in steps of 11.25 degrees). These varied randomly from the  
160 orientation/colour of the items in the memory array. However, we ensured that the  
161 three types of cues (C/O/X or L/R/X) all contained the same range of 16 distractor  
162 features. Out of these 16 distractor features, we randomly assigned 8 as colour features  
163 and 8 as orientation features.

164

165 After another fixation period of 700 ms (after the distractor), the colour-wheel or a  
166 white-circle probe appeared. To keep the orientation and colour recall as similar as  
167 possible, we presented the colours at a fixed position on the colour wheel. Participants  
168 were instructed to respond as accurately as possible by using the ‘J’ and ‘F’ key to rotate  
169 the probe counter-clockwise and clockwise, respectively. Participants were instructed  
170 to use their left index finger to press the ‘J’ key and the right index finger to press the ‘F’  
171 key. Although there was no explicit time limit for the response time, we logged reaction

172 times as the time between the onset of the probe and the first button press that initiated  
 173 the ‘dial-up’ report. Reaction time therefore serves as a proxy for the time it took  
 174 participants to access the relevant memory information before commencing their  
 175 reproduction report.  
 176

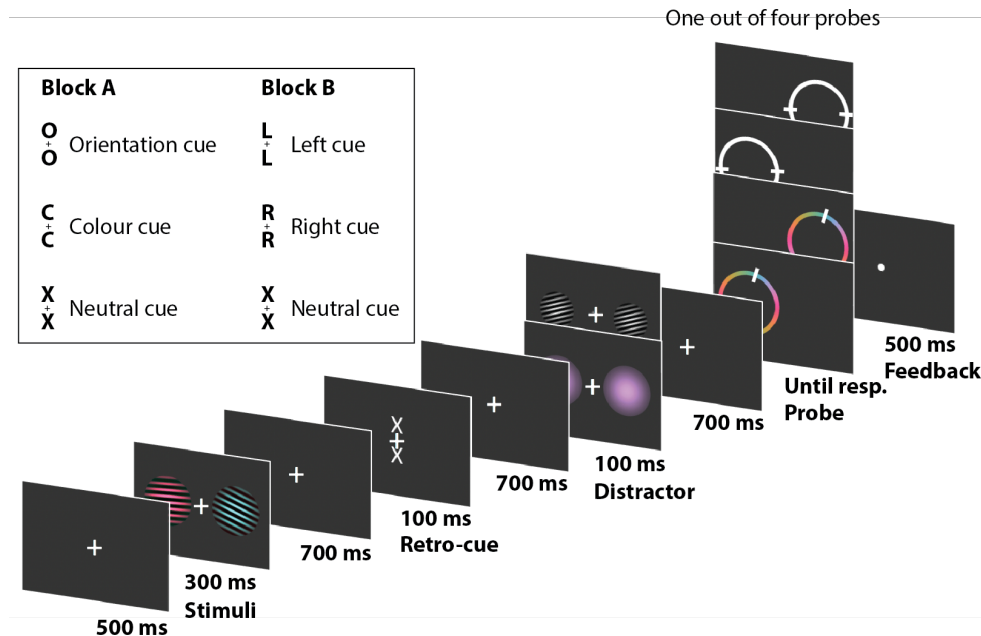

177  
 178 **Figure 1. Experimental design with timings.** Participants were presented with two coloured Gabor gratings to  
 179 memorise. Subsequently, a retro-cue informed participant which item or feature dimension would be probed. After  
 180 either a colour distractor or an orientation distractor with a semi-randomly drawn orientation or feature, the probe  
 181 was presented. Participants adjusted the probe dial to match the feature in memory.  
 182

### 183 *Behavioural analysis*

184 We computed the error for each trial for each participant by subtracting the target  
 185 orientation or colour (in radians around the colour circle in CIE L\*a\*B space) from the  
 186 probe response. All error scores were mapped onto a  $-\frac{1}{2}\pi$  to  $\frac{1}{2}\pi$  space. All trials for  
 187 which the reaction time was more than 4 standard deviations above a participant’s mean  
 188 decision time were discarded ( $0.9\% \pm 0.3\%$ ). To calculate the retro-cue benefit, we  
 189 subtracted the absolute error on cued trials from the absolute error on neutral trials. In  
 190 all our analyses, we only compared trials of one retro-cueing condition with neutral  
 191 trials from the same blocks.  
 192

193 A mixture model was fitted separately for each retro-cueing condition and respective  
 194 neutral condition, modelling target response rate, guess rate, swap responses, and  
 195 precision to the error data of each subject (Bays, Catalao, & Husain, 2009; Zhang & Luck,  
 196 2008). We fitted the mixture model separately for every subject, colour or orientation  
 197 recall, spatial or feature retro-cues, and informative or neutral retro-cues. Estimating  
 198 the mixture-model parameters allowed for estimation of different components that  
 199 contribute the overall error; we estimated the fidelity of the representation  
 200 independently of the guess and swap rate. We used the mixture model made available  
 201 by Bays et al. (2009).  
 202

203 When comparing more than two conditions, we applied a repeated-measures analysis  
 204 of variance (rmANOVA) and report  $\eta^2$  as a measure of effect size. When evaluating

205 retro-cueing benefits, we applied dependent samples t-test, comparing informative vs  
206 neutral cues, as well as the cueing effects between item and feature retro-cues. When  
207 the assumption of normality was violated we instead applied a Wilcoxon signed-rank  
208 test. We report Cohen's d as a measure of effect size for parametric tests and matched  
209 rank biserial correlation for non-parametric effect size. For evaluation we two-sided  
210 tests with a critical alpha value of 0.05.

211

### 212 *EEG acquisition*

213 EEG data were collected using Synamps amplifiers and Neuroscan software  
214 (Compumedics). We used a 61 Ag/AgCl sintered electrodes (EasyCap, Herrsching,  
215 Germany), laid out according to the international 10-10 system, with mastoids behind  
216 the left and right ear. The left mastoid was used as an active reference during the  
217 recordings. Offline, an average-mastoids reference was derived using the left and right  
218 mastoids. The ground electrode was placed on the left arm above the elbow. Horizontal  
219 EOG was measured using lateral electrodes next to both eyes while vertical EOG was  
220 measured above and below the left eye. Data were sampled at 1000 Hz, and stored for  
221 subsequent analysis.

222

### 223 *EEG preprocessing*

224 Data were imported into MATLAB 2017a using *pop\_loadcurry()* and further analysed  
225 using Fieldtrip (Oostenveld, Fries, Maris, & Schoffelen, 2011) and the OHBA Software  
226 Library (OSL; <https://ohba-analysis.github.io/>). Analysis started by cutting out the  
227 epochs between 100 ms before and 2200 ms after retro-cue onset (*ft\_redefintrial*)  
228 followed by re-referencing the data to the average of the mastoids (*ft\_preprocessing*).  
229 EEG data were down sampled to 200 Hz to reduce computational demands and storage  
230 space (*ft\_resampleddata*).

231

232 Next, EEG data were further de-noised using Independent Component Analysis (ICA;  
233 *ft\_componentanalysis*) applying the FastICA algorithm (Hyvärinen, 1999) to all EEG  
234 sensors. ICA separates the EEG signal into non-Gaussian subcomponents of the data  
235 that are statistically independent from one another. Spatial components strongly  
236 correlated ( $r > 0.4$ ) with electrooculogram (EOG) channels were removed from the EEG  
237 data. We set-out to remove trials on which participants blinked during the window of  
238 100 ms prior up to 200 ms post retro-cue presentation. After baselining the horizontal  
239 EOG signal at -300 to -100 ms trials on which horizontal EOG voltage surpassed 200  $\mu\text{V}$   
240 (approximately  $\frac{1}{2}$  of the maximum voltage evoked by a typical blink) were flagged and  
241 later removed from EEG and behavioural analyses ( $0.446\% \pm 1.23\%$ ; mean  $\pm$  standard  
242 deviation). Subsequently, we removed epochs based on within-trial variance of the  
243 broadband signal at a 0.05 significance threshold using a generalised ESD test (Rosner,  
244 1983; implemented in OSL) and discarded  $2.48\% \pm 2.18\%$  (mean  $\pm$  standard deviation)  
245 of the trials.

246

### 247 *Time-frequency processing*

248 Time-frequency decomposition of the EEG signal was done using *ft\_freqanalysis*.  
249 Spectral power between 2 and 50 Hz was computed on Hanning-tapered data using a  
250 short-time Fourier Transform, with a 300-ms sliding time window that was advanced in  
251 steps of 15 ms. We zoom in on modulations in posterior alpha oscillations, by averaging

252 the time-frequency plots for the 17 most posterior electrodes and calculating the  
253 normalised differences in power following between informative and neutral retro-cues  
254 ( $[(\text{informative} - \text{neutral}) / (\text{informative} + \text{neutral})] \times 100$ ). We did this separately for left  
255 and right item retro-cues, and for colour and orientation feature retro-cues. We also  
256 compared left vs. right, and colour vs. orientation, retro-cue conditions directly using  
257 the same quantification. For statistical evaluation, we applied a two-sided cluster-based  
258 permutation analysis (Maris & Oostenveld, 2007) with 5000 permutations at an  
259 evaluation threshold of 0.05.

260

261 To characterise the onset of alpha attenuation after the retro-cue, we extracted the time  
262 course of 7-12 Hz power modulation (in the specified informative vs. neutral cue  
263 contrast) and focused on the 0-1000 ms period post retro-cue onset. On these data, we  
264 then identified the earliest timepoint in which the power modulation reached half of its  
265 minimal value for each condition. This latency was used as a measure to compare neural  
266 modulation by feature retro-cues and item retro-cues.

267

268 To depict the topography of the power modulations analysed in the predefined set of  
269 posterior electrodes (depicted in **Figure 4**), we calculated the relevant contrast for each  
270 electrode and averaged over the time-frequency window of 400-800 ms and 7-12 Hz for  
271 the values of all posterior electrodes (O<sub>2</sub>, PO<sub>8</sub>, PO<sub>4</sub>, P<sub>8</sub>, P<sub>6</sub>, P<sub>4</sub>, P<sub>2</sub>, O<sub>1</sub>, PO<sub>7</sub>, PO<sub>3</sub>, P<sub>7</sub>,  
272 P<sub>5</sub>, P<sub>3</sub>, P<sub>1</sub>, Oz, POz, Pz). In addition, to focus on alpha lateralisation, we contrasted  
273 activity in electrodes left posterior electrodes (O<sub>1</sub>, PO<sub>7</sub>, PO<sub>3</sub>, P<sub>7</sub>, P<sub>5</sub>, P<sub>3</sub>, P<sub>1</sub>) and right  
274 posterior electrodes (O<sub>2</sub>, PO<sub>8</sub>, PO<sub>4</sub>, P<sub>8</sub>, P<sub>6</sub>, P<sub>4</sub>, P<sub>2</sub>), contralateral vs ipsilateral to the  
275 cued item following informative item retro-cues.

276 Topographies were intended solely to portray the nature of the modulation and were  
277 not subjected to further statistical testing.

278

## 279 Results

280 **Figure 2A** shows behavioural performance as a function of experimental condition  
281 (collapsed over distractor type, as this did not yield consistent results as discussed  
282 below). To analyse the effects of item and feature-dimension retro-cues, we quantified  
283 retro-cueing benefits as the difference between the trials with informative and neutral  
284 retro-cues (**Figure 2B**).

285

286 To quantify formally the effects of retro-cue informativeness (valid or neutral) and  
287 retro-cue block type (item retro-cue block or feature retro-cue block) we used a 2 x 2  
288 rmANOVA. We ran this separately for RT and response error, and separately for both  
289 colour and orientation recall reports. We observed a significant main effect of retro-cue  
290 informativeness, with better performance following informative vs. neutral retro-cues  
291 on all four dependent variables: orientation error ( $F_{1,29} = 18.888$ ;  $p < .001$ ;  $\eta^2 = 0.394$ ),  
292 colour error ( $F_{1,29} = 26.387$ ;  $p < .001$ ;  $\eta^2 = 0.476$ ), orientation RT ( $F_{1,29} = 67.27$ ;  $p < .001$ ;  $\eta^2$   
293  $= 0.699$ ), and colour RT ( $F_{1,29} = 65.15$ ;  $p < .001$ ;  $\eta^2 = 0.692$ ). At the same time, we found  
294 that the behavioural benefits of retro-cue informativeness were larger in item retro-cue  
295 blocks than in feature retro-cue blocks, yielding a significant interaction for colour error  
296 ( $F_{1,29} = 9.065$ ;  $p = .005$ ;  $\eta^2 = 0.238$ ), orientation RT ( $F_{1,29} = 19.64$ ;  $p < .001$ ;  $\eta^2 = 0.404$ ), and  
297 colour RT ( $F_{1,29} = 21.00$ ;  $p < .001$ ;  $\eta^2 = 0.420$ ). Though we found the same trend, this did

298 not reach significance for orientation error ( $F_{1,29} = 3.750$ ;  $p = .063$ ;  $\eta^2 = 0.115$ ). Finally, in  
299 line with the larger benefit of item-retro-cues, we also found a significant main effect of  
300 block type, constituted by better performance in item retro-cue blocks for all four  
301 dependent variables: orientation error ( $F_{1,29} = 39.634$ ;  $p < .001$ ;  $\eta^2 = 0.577$ ), colour error,  
302  $F_{1,29} = 8.343$ ;  $p = .007$ ;  $\eta^2 = 0.223$ ), orientation RT,  $F_{1,29} = 50.51$ ;  $p < .001$ ;  $\eta^2 = 0.635$ ), and  
303 colour RT ( $F_{1,29} = 32.08$ ;  $p < .001$ ;  $\eta^2 = 0.525$ ).

304  
305 For completeness, we also considered the third factor ‘distractor congruence’ (i.e., when  
306 the distractor contained the same or the other feature dimension as the to-be-recalled  
307 memory feature), but found no systematic effects of distractor congruence across our  
308 four dependent variables, nor interactions with the factors of interest – see  
309 **supplementary table 1**.

310  
311 In the following, we describe in more detail the item- and feature retro-cueing effects  
312 of interest, in accordance with the data presented in **Figure 2**.

313  
314 For orientation recall reports, participants significantly benefitted from item retro-cues.  
315 They had smaller errors ( $t_{29} = 4.235$ ;  $p < .001$ ;  $d = 0.773$ ) and responded faster ( $t_{29} = 7.854$ ;  
316  $p < .001$ ;  $d = 1.434$ ), compared to trials with neutral retro-cues in the same blocks.  
317 Similarly, orientation reports benefitted significantly from feature cues in both  
318 reproduction error ( $t_{29} = 3.748$ ;  $p = .001$ ;  $d = 0.684$ ) and response onset time ( $t_{29} = 6.302$ ;  
319  $p < .001$ ;  $d = 1.151$ ) compared to neutral trials within the feature retro-cueing blocks. Item  
320 cues conferred numerically larger benefits than feature cues. The difference was not  
321 statistically significant for error (0.023 radian, 48%;  $t_{29} = 1.936$ ;  $p = .063$ ;  $d = .354$ ), but  
322 reached significance for reaction times (79 ms, 94%;  $t_{29} = 4.431$ ;  $p < .001$ ;  $d = 0.809$ ).

323  
324 The same pattern of results was found for the error and reaction times in the colour  
325 recall trials: colour reports benefitted from both item cues ( $t_{29} = 5.060$ ;  $p < .001$ ;  $d =$   
326  $0.924$ ) and feature cues ( $t_{29} = 4.069$ ;  $p < .001$ ;  $d = 0.743$ ) and responses were also faster  
327 for item cues ( $t_{29} = 9.097$ ;  $p < .001$ ;  $d = 1.661$ ) and feature cues ( $t_{29} = 4.951$ ;  $p < .001$ ;  $d =$   
328  $0.904$ ) compared to their respective neutral trials. For colour reports, we also found  
329 greater benefits of item retro-cues compared to feature retro-cues for both error (0.039  
330 rad, 86%;  $t_{29} = 3.011$ ;  $p = .005$ ;  $d = 0.550$ ) and reaction time (63 ms, 91%;  $t_{29} = 4.583$ ;  $p <$   
331  $.001$ ;  $d = 0.837$ ).

332  
333 Benefits of item-based and feature-based retro-cueing showed strong positive  
334 correlations across individuals for both colour and orientation reports (**Figure 2C**). For  
335 orientation reports, we found significant correlations between retro-cueing benefits  
336 following item cues and feature cues for both error ( $r = .709$ ;  $p < .001$ ) and reaction time  
337 ( $r = .539$ ;  $p = .002$ ). Likewise, for colour reports, we found significant correlations  
338 between retro-cueing benefits following item cues and feature cues for both error ( $r =$   
339  $.697$ ;  $p < .001$ ) and reaction time ( $r = .596$ ;  $p < .001$ ). Thus, participants who benefitted  
340 most from item retro-cues also benefitted most from feature retro-cues.



341

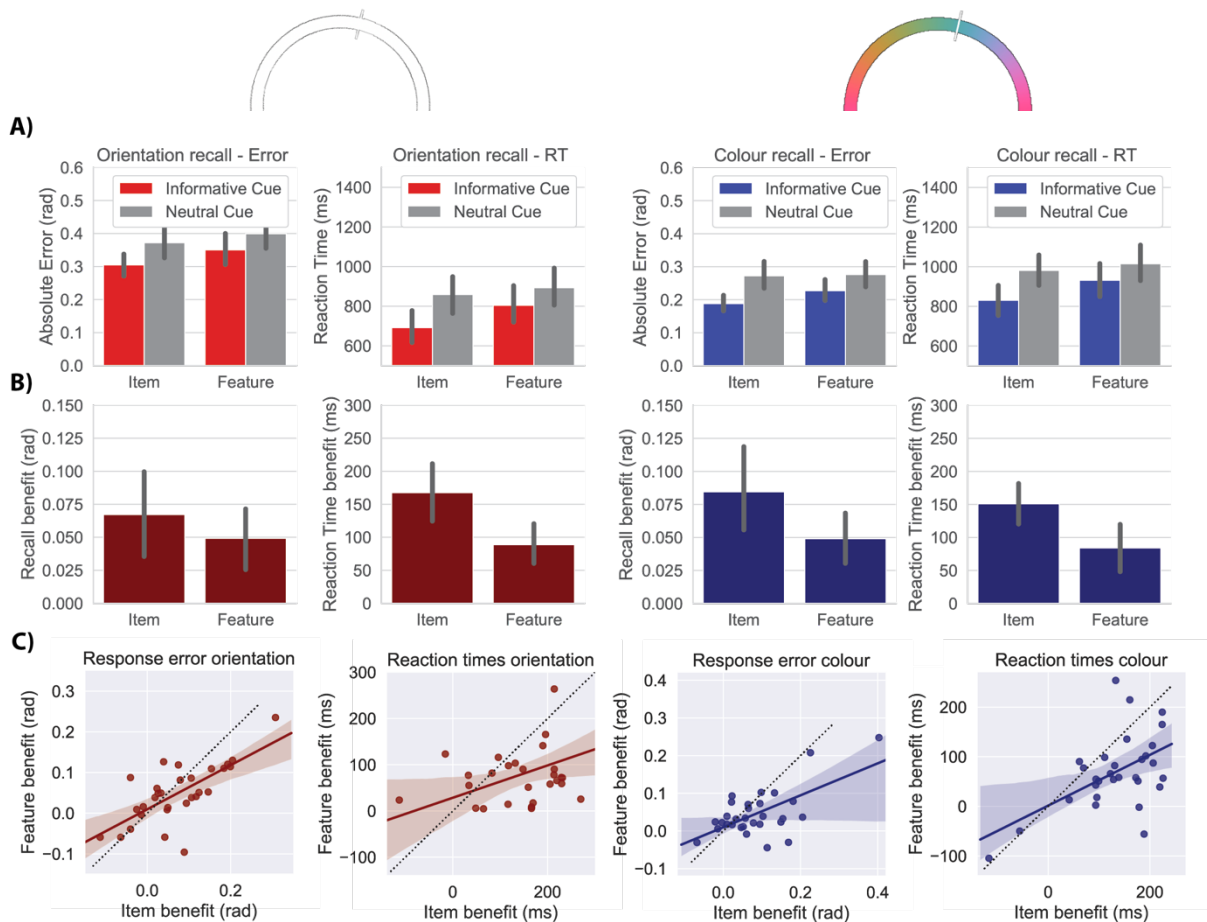

342

343

344

345

346

347

348

349

350

351

352

353

354

355

356

357

358

359

360

361

362

363

364

365

**Figure 2. Performance benefits of item and feature-dimension retro cueing.** A) The four panels show absolute error and reaction times for trials with an informative cue or a neutral cue. Trials in which orientation was probed are displayed in red while colour-probe trials are displayed in blue. Each panel shows the data separately for item retro-cue blocks and feature retro-cue blocks. B) Behavioural benefit of retro-cues. Subtracting the mean absolute error on trials with an informative cue from the neutral trials gives the performance benefit of the retro-cue – here expressed as positive values. Orientation benefit is depicted in dark red and colour benefit in dark blue. C) Correlations across participants between the item and feature retro-cue benefits in shown in B. Error bars show 95% confidence intervals.

### Mixture modelling

In addition to the raw behavioural scores, we also modelled sources of error using a mixture model (Figure 3AB; Bays et al., 2009). We modelled four components 1) precision, characterised by width ( $1/\text{STD}$ ) of the target centred response distribution, 2) proportion of target responses modelled by the gaussian centred around the target, 3) proportion of random responses characterised by the height of the uniform response distribution, 4) proportion of responses to the non-cued feature of the same dimension as the cued feature (non-target report or 'swap' errors). Figure 3A and B show the retro-cueing effects (informative vs. neutral) on each of these four parameters, separately for item and feature-cues (collapsed over colour and orientation reports, after fitting the model for each condition separately; see Supplementary figure 1 for mixture model parameters separated for colour and orientation reports). As depicted in Figure 3A,B informative (vs. neutral) retro-cues significantly increased precision for item retro-cues

366 (item:  $t_{29} = 2.736$ ;  $p = .011$ ;  $d = 0.500$ ) though this did not reach significance for feature  
 367 retro-cues:  $t_{29} = 0.578$ ;  $p = .568$ ;  $d = 0.105$ ). At the same time, both item and feature retro-  
 368 cues increased target response rates (item:  $t_{29} = 5.595$ ;  $p < .001$ ;  $d = 1.022$ ; feature:  $Z_{29} =$   
 369  $382$ ;  $p = .001$ ;  $r_{rb} = 0.643$ ), and decreased guess rates (item:  $t_{29} = -2.131$ ;  $p = .042$ ;  $d = -0.389$ ;  
 370 feature:  $Z_{29} = 78$ ;  $p < .001$ ;  $r_{rb} = -0.665$ ), and item retro-cues further decreased swap rate  
 371 (item:  $Z_{29} = 21$ ;  $p < .001$ ;  $r_{rb} = -0.910$ ; feature:  $Z_{29} = 137$ ;  $p = .080$ ;  $r_{rb} = -0.368$ ).

372

373 Direct comparisons between item and feature retro-cue benefits showed a significantly  
 374 greater reduction in the rate of swap errors by item retro-cues relative to feature retro-  
 375 cues (Wilcoxon signed-rank test;  $Z_{29} = 95$ ;  $p = 0.002$ ;  $r_{rb} = 0.591$ ; see **Figure 3AB**). Effects  
 376 for the other three parameters were not statistically different between item and feature  
 377 retro-cues (all  $p > .10$ ).

378

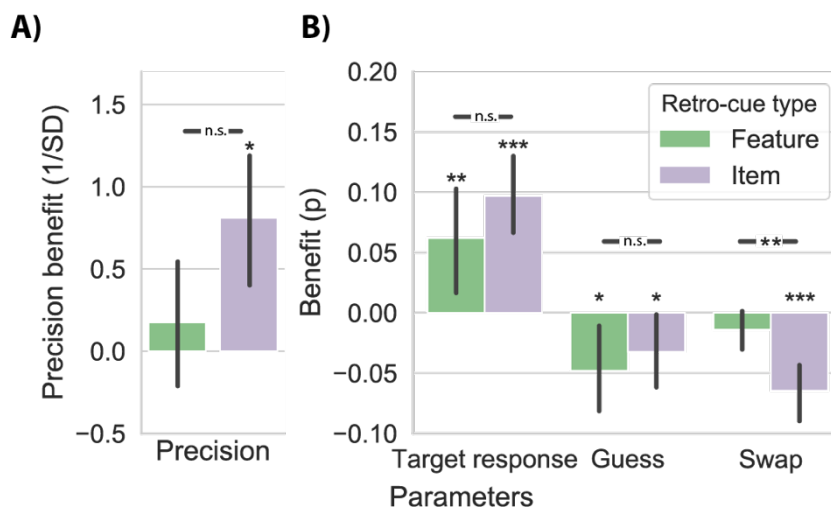

379

380 **Figure 3. Cueing effects on mixture modelling parameters.** A) Mixture-model estimates for the cueing effects  
 381 on A) precision, B) target response, guess rate, and swap rate, for trials where item retro-cues or feature retro-cues  
 382 were presented compared to neutral trials. Hence, valid retro-cues positively influenced target response proportions  
 383 and negatively influenced guess rate and swap rate. The green and purple asterisks indicate significant differences  
 384 of, respectively, item- or feature benefits from zero (i.e., benefits following informative vs. neutral cues). Black  
 385 asterisks indicate significant differences between item and feature retro-cueing benefits. Error bars indicate 95%  
 386 confidence intervals. \*  $p < .05$ , \*\*  $p < .01$ , \*\*\*  $p < .001$ .

387

### 388 *Alpha attenuation following feature and item retro-cues*

389 **Figure 4** shows the time- and frequency-resolved modulations in spectral EEG power  
 390 in posterior electrodes following item and feature retro-cues, expressed as a difference  
 391 from the neutral retro-cueing condition (neutral retro-cue minus informative retro-  
 392 cue). After both item retro-cues and feature retro-cues, we observe an attenuation of  
 393 alpha power starting at around 400 ms after presentation of the retro-cue (clusters all  
 394 conditions  $p < .001$ ). The alpha attenuation in trials with informative retro-cues re-  
 395 emerges after the distractor onset, in the window just prior to the probe. To reveal the  
 396 spatial layout of the significant clusters, we visualised the EEG topographies of the  
 397 alpha-band power at 400 to 800 ms after the retro-cue. Similar topographies were  
 398 associated with the later alpha modulation after the distractor and with the early  
 399 modulation in the higher 13-30 Hz band (topographies not depicted).

400

401 In addition to this ‘global effect’ when comparing informative to neutral retro-cues, we  
 402 also evaluated the difference between left and right item cues, and between colour and  
 403 orientation feature cues (**Figure 4AB** right topographies, see also **Supplementary**  
 404 **Figure 2** for corresponding time-frequency maps). In line with several prior studies  
 405 (Myers et al., 2015; Poch et al., 2017; van Ede et al., 2017; Wallis et al., 2015; Wolff et al.,  
 406 2017), following item cues, alpha attenuation was most pronounced contralateral to the  
 407 memorised location of the cued item. In contrast, following feature retro-cues no clear  
 408 differences were observed between colour and orientation cues, which directed  
 409 attention to a single feature-dimension that was shared between the left and right items.  
 410 Finally, we found that the alpha attenuation had very similar latencies following item-  
 411 directing and feature-directing retro-cues ( $t_{29} = 1.273$ ;  $p = .213$ ; **Supplementary Figure**  
 412 **3**).  
 413

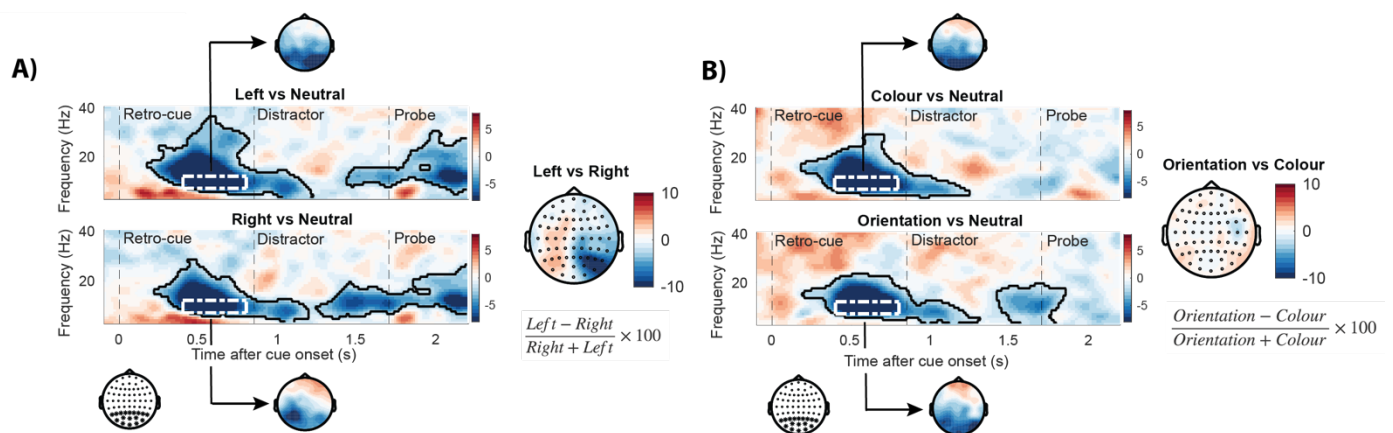

414 **Figure 4. Induced neural EEG responses to the left and right item retro-cues and to colour and orientation**  
 415 **feature retro-cues.** A) Time-frequency representation of the difference between left/right cued trials vs. neutral  
 416 trials in item-cue blocks in the predefined posterior electrode cluster indicated with asterisks below the plots. The  
 417 topography to the right shows the difference between left and right retro-cues (**Supplementary Fig. 2** for the  
 418 corresponding time-frequency map of the difference between contralateral and ipsilateral responses). B) Same  
 419 representations as outlined above but here we compare colour and orientation with their respective neutral trials or  
 420 with one another. Highlighted areas with the black solid outline indicate significant clusters (permutation test,  $n =$   
 421  $30$ , cluster-forming threshold  $p < .05$ , corrected significance threshold  $p < .05$ ). The topographies display the alpha  
 422 power (7-12 Hz) in the 400-800 ms window that is also demarcated in the time-frequency plots with the white dashed  
 423 boxes.  
 424

## 425 Discussion

426 We demonstrate that both item-based and feature-based attentional prioritisation  
 427 during VWM maintenance decreases recall error and speeds response initiation times  
 428 following the probe. Hence, we replicate the finding that selective attention can  
 429 retrospectively prioritise not only items (Griffin & Nobre, 2003; Kuo et al., 2011; Landman  
 430 et al., 2003; Souza & Oberauer, 2016), but also feature dimensions maintained in VWM  
 431 (Niklaus et al., 2017; Park et al., 2017; Ye et al., 2016; Yu & Shim, 2017). Building on this  
 432 work, our experimental design uniquely allowed us to compare the magnitudes of both  
 433 types of behavioural retro-cue benefits within a single experiment, and to correlate their  
 434 strengths across participants. While the item benefit was larger than feature benefit,  
 435 both were both highly robust. They were each evident across both colour and  
 436 orientation reports and in both recall accuracy and response initiation times. Moreover,  
 437 we found strong correlations between the benefits that followed item and feature cues,

438 and qualitatively similar neural modulations, which suggest that the two types of retro-  
439 cueing benefits may share similar cognitive operations and resources.

440  
441 The notion that both retro-cueing types yield behavioural benefits that are qualitatively  
442 similar was further supported by the similar retro-cueing effects on guess-rate, and  
443 target-response rate parameters estimated by the mixture model. At the same time, we  
444 observed that only item cues significantly enhanced precision and reduced the  
445 probability of swaps (non-target responses) – the latter being the only parameter that  
446 also differed significantly between item and feature retro-cue benefits. This difference  
447 is likely explained by the fact that swaps are calculated between items (not between  
448 features). Provided that feature-cues always concerned one feature, shared across both  
449 items, they may have helped up-regulate the relevant feature-dimension, but not to  
450 separate the two spatially-segregated items and thereby to reduce swap rates (in  
451 contrast to item cues that directly targeted the relevant item from the two memorised  
452 items).

453  
454 In a strict account in which the primary unit of VWM is integrated items (Luck & Vogel,  
455 1997; Vogel et al., 2001), one may predict that attention in VWM will primarily operate  
456 at the level of items, leaving little room for attentional facilitation of specific features  
457 that are shared among items. Alternatively, if VWM consists of a hierarchy of  
458 representations, with both item-level and feature-level representations (Bays, Wu, &  
459 Husain, 2011; Fougny & Alvarez, 2011; Töllner, Conci, Müller, & Mazza, 2016; Töllner,  
460 Mink, & Müller, 2015); then one may expect that attention can operate similarly at  
461 distinct levels, depending on the nature of the task at hand. Our data are in line with a  
462 mixture of both scenarios – showing that attention can operate qualitatively similarly at  
463 both item and feature levels, while also revealing an additional benefit when attention  
464 is directed at two features of a single item (following item cues), compared to a single  
465 feature across two items (following feature cues).

466  
467 At the same time, we note that attentional benefits in behavioural performance in VWM  
468 tasks need not only reflect changes in the quality of representational information.  
469 Factors related to prospective task preparation may also contribute (Myers, Stokes, &  
470 Nobre, 2017). Therefore, while our data provide clear evidence for the benefit of feature  
471 retro-cues – which is qualitatively similar to, and correlated with, the benefit following  
472 item cues – it remains possible that at least part of these benefits are due to factors other  
473 than a change in the underlying mnemonic representation (and this holds for both item  
474 and feature retro-cueing benefits).

475  
476 In addition to the behavioural performance data, we also observed commonalities in the  
477 neural modulation following item and feature cues; both cases showing robust alpha  
478 attenuation over posterior electrodes, arising around the same time, with a similar  
479 magnitude. The neural responses therefore provide important relevant complementary  
480 data to our behavioural performance data. They provide more direct evidence for an  
481 early modulation in posterior (putatively visual) brain areas following both types of  
482 retro-cues; compatible with a modulation at the level of the memorised visual  
483 representations. However, because we used visual retro-cues, we cannot fully rule out  
484 the possibility that at least part of this modulation may be driven by differential visual

485 processing of informative vs. a neutral retro-cues per se – though we note how our  
486 neutral retro-cues were designed to be similar to our informative retro-cues, ruling out  
487 more obvious differences due to bottom up visual features such as retro-cue size and  
488 saliency.

489

490 In conclusion, retro-cueing studies have typically shown that internally directed  
491 attention can prioritise a subset of mnemonic representations (Griffin & Nobre, 2003;  
492 Rerko, Souza, & Oberauer, 2014; Van Moorselaar, Olivers, Theeuwes, Lamme, Victor, &  
493 Sligte, 2015). These representations are typically thought of as integrated item of  
494 features bound together into a discrete mnemonic item (Luck & Vogel, 1997; Vogel et  
495 al., 2001). Our results show that attention can also effectively be directed to specific  
496 visual features that are shared across multiple items in memory – and for the first time  
497 reveal that such feature cues yield qualitatively similar (albeit weaker) behavioural  
498 benefits and neural modulations or latency, as do item cues, and that item and feature  
499 cueing benefits are correlated across individuals. We argue that retro-cues help place  
500 memorised visual stimuli into a goal-oriented format, such that relevant information at  
501 both the item and the feature-level can be optimised for upcoming task performance.

502

## 503 **References**

- 504 Alvarez, G. A., & Cavanagh, P. (2004). The Capacity of Visual Short- Term Memory Is  
505 Set Both by Visual Information Load and by Number of Objects, *15*(2), 106–111.
- 506 Baddeley, A. D. (1992). Working Memory. *Science*, *255*(Jan), 556–559.  
507 <https://doi.org/DOI: 10.1126/science.1736359>
- 508 Baddeley, A. D. (2003). Working memory: looking back and looking forward. *Nature*  
509 *Reviews. Neuroscience*, *4*(10), 829–839. <https://doi.org/10.1038/nrn1201>
- 510 Bays, P. M., Catalao, R. F. G., & Husain, M. (2009). The precision of visual working  
511 memory is set by allocation of a shared resource. *Journal of Vision*, *9*(10), 7.1–11.  
512 <https://doi.org/10.1167/9.10.7>
- 513 Bays, P. M., & Husain, M. (2008). Dynamic shifts of limited working memory resources  
514 in human vision. *Science (New York, N.Y.)*, *321*(5890), 851–854.  
515 <https://doi.org/10.1126/science.1158023>
- 516 Bays, P. M., Wu, E. Y., & Husain, M. (2011). Storage and binding of object features in  
517 visual working memory. *Neuropsychologia*, *49*(6), 1622–1631.  
518 <https://doi.org/10.1016/j.neuropsychologia.2010.12.023>
- 519 Brainard, D. H. (1997). The Psychophysics Toolbox. *Spatial Vision*, *10*, 433–436.  
520 <https://doi.org/10.1163/156856897X00357>
- 521 Fougner, D., & Alvarez, G. A. (2011). Object features fail independently in visual  
522 working memory: Evidence for a probabilistic feature-store model. *Journal of*  
523 *Vision*, *11*(12), 3–3. <https://doi.org/10.1167/11.12.3.Introduction>
- 524 Griffin, I. C., & Nobre, A. C. (2003). Orienting attention to locations in internal  
525 representations. *Journal of Cognitive Neuroscience*, *15*(8), 1176–1194.  
526 <https://doi.org/10.1162/089892903322598139>
- 527 Hyvärinen, A. (1999). Fast and robust fixed-point algorithms for independent  
528 component analysis. *IEEE Transactions on Neural Networks*, *10*(3), 626–634.  
529 <https://doi.org/10.1109/72.761722>
- 530 Kuo, B.-C., Stokes, M. G., & Nobre, A. C. (2011). Attention Modulates Maintenance of  
531 Representations in Visual Short-term Memory. *Journal of Cognitive Neuroscience*,

- 532 24(1), 51–60. [https://doi.org/10.1162/jocn\\_a\\_00087](https://doi.org/10.1162/jocn_a_00087)
- 533 Landman, R., Spekreijse, H., & Lamme, V. A. F. (2003). ScienceDirect - Vision  
534 Research : Large capacity storage of integrated objects before change blindness.  
535 *Vision Research*, 43, 149–164.
- 536 Luck, S. J., & Vogel, E. K. (1997). The capacity of visual working memory for features  
537 and conjunctions. *Nature*, 390(6657), 279–281. <https://doi.org/10.1038/36846>
- 538 Maris, E., & Oostenveld, R. (2007). Nonparametric statistical testing of EEG- and MEG-  
539 data. *Journal of Neuroscience Methods*, 164(1), 177–190.  
540 <https://doi.org/10.1016/j.jneumeth.2007.03.024>
- 541 Myers, N. E., Stokes, M. G., & Nobre, A. C. (2017). Prioritizing Information during  
542 Working Memory: Beyond Sustained Internal Attention. *Trends in Cognitive*  
543 *Sciences*, 21(6), 449–461. <https://doi.org/10.1016/j.tics.2017.03.010>
- 544 Myers, N. E., Walther, L., Wallis, G., Stokes, M. G., & Nobre, A. C. (2015). Temporal  
545 Dynamics of Attention during Encoding versus Maintenance of Working  
546 Memory: Complementary Views from Event-related Potentials and Alpha-band  
547 Oscillations. *Journal of Cognitive Neuroscience*, 27(3), 492–508.  
548 <https://doi.org/10.1162/jocn>
- 549 Niklaus, M., Nobre, A. C., & Van Ede, F. (2017). Feature-based attentional weighting  
550 and spreading in visual working memory. *Scientific Reports*, 7, 1–10.  
551 <https://doi.org/10.1038/srep42384>
- 552 Nobre, A. C. (2018). Sensation, Perception, and Action. In J. T. Wixted & J. T. Serences  
553 (Eds.), *Stevens' Handbook of Experimental Psychology and Cognitive Neuroscience*  
554 (Fourth Edi, pp. 241–316). New York: John Wiley & Sons Incl.
- 555 Oostenveld, R., Fries, P., Maris, E., & Schoffelen, J. M. (2011). FieldTrip: Open source  
556 software for advanced analysis of MEG, EEG, and invasive electrophysiological  
557 data. *Computational Intelligence and Neuroscience*, 2011.  
558 <https://doi.org/10.1155/2011/156869>
- 559 Park, Y. E., Sy, J. L., Hong, S. W., & Tong, F. (2017). Reprioritization of Features of  
560 Multidimensional Objects Stored in Visual Working Memory. *Psychological*  
561 *Science*, 28(12), 1773–1785. <https://doi.org/10.1177/0956797617719949>
- 562 Pilling, M., & Barrett, D. J. K. (2016). Dimension-based attention in visual short-term  
563 memory. *Memory and Cognition*, 44(5), 740–749. <https://doi.org/10.3758/s13421-016-0599-6>
- 564
- 565 Poch, C., Capilla, A., Hinojosa, J. A., & Campo, P. (2017). Selection within working  
566 memory based on a color retro-cue modulates alpha oscillations.  
567 *Neuropsychologia*, 106(July), 133–137.  
568 <https://doi.org/10.1016/j.neuropsychologia.2017.09.027>
- 569 Rerko, L., Souza, A. S., & Oberauer, K. (2014). Retro-cue benefits in working memory  
570 without sustained focal attention. *Memory and Cognition*, 42(5), 712–728.  
571 <https://doi.org/10.3758/s13421-013-0392-8>
- 572 Rosner, B. (1983). Percentage Outlier Points for Generalized ESD Many- Procedure.  
573 *Technometrics*, 25(2), 165–172.
- 574 Souza, A. S., & Oberauer, K. (2016). In search of the focus of attention in working  
575 memory: 13 years of the retro-cue effect. *Attention, Perception, and Psychophysics*,  
576 78(7), 1839–1860. <https://doi.org/10.3758/s13414-016-1108-5>
- 577 Töllner, T., Conci, M., Müller, H. J., & Mazza, V. (2016). Attending to multiple objects  
578 relies on both feature- and dimension-based control mechanisms: Evidence from

- 579 human electrophysiology. *Attention, Perception, and Psychophysics*, 78(7), 2079–  
580 2089. <https://doi.org/10.3758/s13414-016-1152-1>
- 581 Töllner, T., Mink, M., & Müller, H. J. (2015). Searching for targets in visual working  
582 memory: Investigating a dimensional feature bundle (DFB) model. *Annals of the*  
583 *New York Academy of Sciences*, 1339(1), 32–44. <https://doi.org/10.1111/nyas.12703>
- 584 van Ede, F. (2018). Mnemonic and attentional roles for states of attenuated alpha  
585 oscillations in perceptual working memory: a review. *European Journal of*  
586 *Neuroscience*, 48(7), 2509–2515. <https://doi.org/10.1111/ejn.13759>
- 587 van Ede, F., Niklaus, M., & Nobre, A. C. (2017). Temporal Expectations Guide Dynamic  
588 Prioritization in Visual Working Memory through Attenuated  $\alpha$  Oscillations. *The*  
589 *Journal of Neuroscience*, 37(2), 437–445. [https://doi.org/10.1523/JNEUROSCI.2272-](https://doi.org/10.1523/JNEUROSCI.2272-16.2017)  
590 16.2017
- 591 Van Moorselaar, D., Olivers, C. N. L., Theeuwes, J., Lamme, Victor, A. F., & Sligte, I. G.  
592 (2015). Forgotten But Not Gone : Retro-Cue Costs and Benefits in a Double-  
593 Cueing Paradigm Suggest Multiple States in Visual ... *Journal of Experimental*  
594 *Psychology : Learning , Memory , and Cognition. Journal of Experimental*  
595 *Psychology*, 41(6), 1755–1763. <https://doi.org/10.1037/xlm0000124>
- 596 Vogel, E. K., McCollough, A. W., & Machizawa, M. G. (2005). Neural measures reveal  
597 individual differences in controlling access to working memory. *Nature*,  
598 438(7067), 500–503. <https://doi.org/10.1038/nature04171>
- 599 Vogel, E. K., Woodman, G. F., & Luck, S. J. (2001). Storage of features, conjunctions,  
600 and objects in visual working memory. *Journal of Experimental Psychology*, 27(1),  
601 92–114.
- 602 Wallis, G., Stokes, M. G., Cousijn, H., Woolrich, M., & Nobre, A. C. (2015).  
603 Frontoparietal and Cingulo-opercular Networks Play Dissociable Roles in Control  
604 of Working Memory. *Journal of Cognitive Neuroscience*, 27(10), 2019–2034.  
605 [https://doi.org/https://doi.org/10.1162/jocn\\_a\\_00838](https://doi.org/https://doi.org/10.1162/jocn_a_00838)
- 606 Wolff, M. J., Jochim, J., Akyürek, E. G., & Stokes, M. G. (2017). Dynamic hidden states  
607 underlying working-memory-guided behavior. *Nature Neuroscience*, 20(6), 864–  
608 871. <https://doi.org/10.1038/nn.4546>
- 609 Ye, C., Hu, Z., Ristaniemi, T., Gendron, M., & Liu, Q. (2016). Retro-dimension-cue  
610 benefit in visual working memory. *Scientific Reports*, 6, 1–13.  
611 <https://doi.org/10.1038/srep35573>
- 612 Yu, Q., & Shim, W. M. (2017). Occipital, parietal, and frontal cortices selectively  
613 maintain task-relevant features of multi-feature objects in visual working  
614 memory. *NeuroImage*, 157(May), 97–107.  
615 <https://doi.org/10.1016/j.neuroimage.2017.05.055>
- 616 Zhang, W., & Luck, S. J. (2008). Discrete fixed-resolution representations in visual  
617 working memory. *Nature*, 453(7192), 233–235. <https://doi.org/10.1038/nature06860>
- 618  
619  
620  
621

622 **Supplementary materials**

623

624

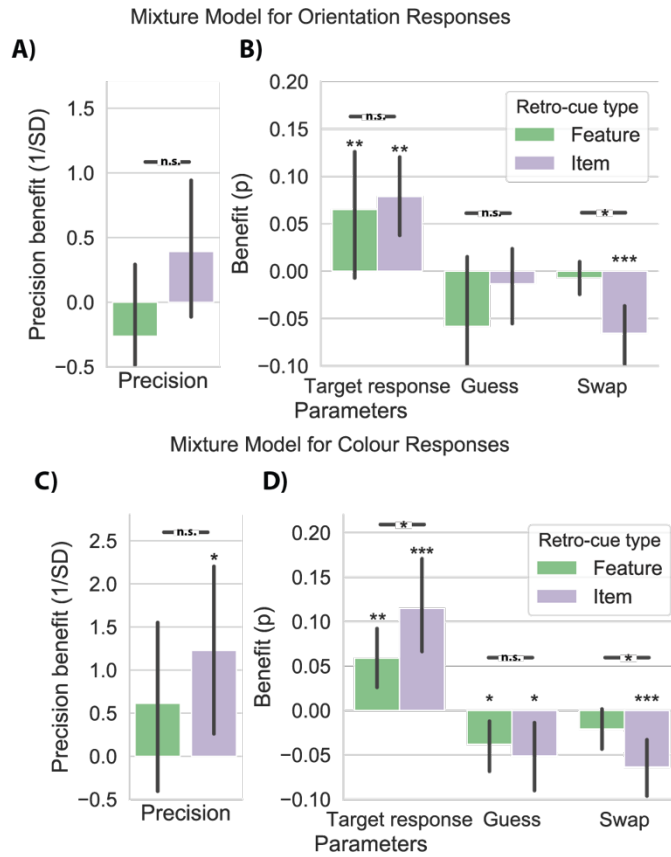

625

626

627

628

629

630

631

632

633

634

**Supplementary Figure 1. Mixture modelling parameters for colour and orientation.** Mixture-model estimates for the benefit of orientation recall in A-B) and colour recall in C-D). Mixture model parameters include precision (A, C), target response, guess rate, and swap rate (B, D) for trials where item retro-cues or feature retro-cues were presented compared to neutral trials. Black asterisks indicate significant differences between item – and feature retro-cueing benefits. Asterisks above bars represent significance of a two-sided t-test of the model parameter benefit against zero. Error bars indicate 95% confidence intervals. \*  $p < .05$ , \*\*  $p < .01$ , \*\*\*  $p < .001$ .



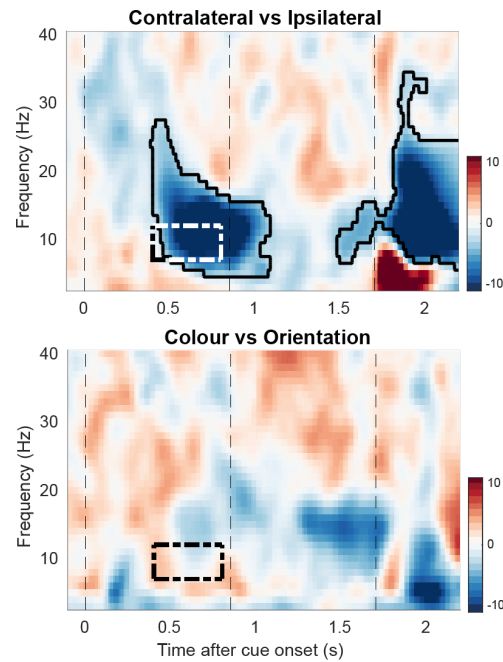

635  
636  
637  
638  
639  
640  
641  
642  
643  
644  
645

**Supplementary Figure 2. Induced neural differences between left vs. right item cues and between colour and orientation feature cues.** Time-frequency maps associated with differences for informative item retro-cues directed at the contralateral vs. ipsilateral item (in selected left and right posterior electrodes; top) and for feature cues directed at colour vs orientation (in all posterior electrodes; bottom). Highlighted areas with the black solid outline indicate significant difference (permutation test,  $n = 30$ , cluster-forming threshold  $p < .05$ , corrected significance threshold  $p < .05$ ). Dashed boxes indicate the window for which the topographies are depicted in **Figure 4**.

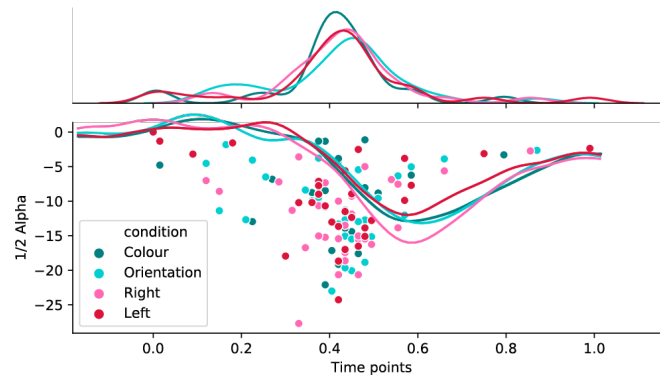

646  
647  
648  
649  
650  
651  
652  
653  
654  
655  
656  
657  
658

**Supplementary Figure 3. Onset times of the alpha attenuation after the retro-cue.** The first time point where the alpha power (neutral – informative cue) reached half of its minimum value in the interval from 0 to 1000 ms after the retro-cue onset was taken as the alpha attenuation latency. The dots represent alpha attenuation latency times for individual subjects and different cueing conditions with a density plot on the top showing the density of the dots along the x-axis for each condition. The line plot illustrates the average alpha power for each condition after subtracting their relative neutral retro-cues.

659 **Supplementary table 1.** Main effects and interactions for the congruence or incongruence of the  
 660 distractor with the probed memory feature, tested with a 2 x 2 x 2 rmANOVA with the factors distractor  
 661 congruence, cue informativeness, and block type, separately for each of our four dependent variables.  
 662  
 663

B) Within Subjects Effects for **Orientation recall: Error**

|                                               | Sum of Squares | df | Mean Square | F     | p     | $\eta^2$ |
|-----------------------------------------------|----------------|----|-------------|-------|-------|----------|
| Distractor                                    | 0.022          | 1  | 0.022       | 5.515 | 0.026 | 0.160    |
| Residual                                      | 0.116          | 29 | 0.004       |       |       |          |
| Retro-cue type * Distractor                   | 7.879e-4       | 1  | 7.879e-4    | 0.256 | 0.617 | 0.009    |
| Residual                                      | 0.089          | 29 | 0.003       |       |       |          |
| Informativeness * Distractor                  | 4.938e-4       | 1  | 4.938e-4    | 0.142 | 0.709 | 0.005    |
| Residual                                      | 0.101          | 29 | 0.003       |       |       |          |
| Retro-cue type * Informativeness * Distractor | 5.667e-5       | 1  | 5.667e-5    | 0.026 | 0.872 | 0.001    |
| Residual                                      | 0.063          | 29 | 0.002       |       |       |          |

664

B) Within Subjects Effects for **Colour recall: Error**

|                                               | Sum of Squares | df | Mean Square | F     | p     | $\eta^2$ |
|-----------------------------------------------|----------------|----|-------------|-------|-------|----------|
| Distractor                                    | 7.333e-4       | 1  | 7.333e-4    | 0.286 | 0.597 | 0.010    |
| Residual                                      | 0.074          | 29 | 0.003       |       |       |          |
| Retro-cue type * Distractor                   | 0.001          | 1  | 0.001       | 1.290 | 0.265 | 0.043    |
| Residual                                      | 0.023          | 29 | 7.788e-4    |       |       |          |
| Informativeness * Distractor                  | 0.001          | 1  | 0.001       | 0.643 | 0.429 | 0.022    |
| Residual                                      | 0.050          | 29 | 0.002       |       |       |          |
| Retro-cue type * Informativeness * Distractor | 2.928e-4       | 1  | 2.928e-4    | 0.295 | 0.591 | 0.010    |
| Residual                                      | 0.029          | 29 | 9.912e-4    |       |       |          |

C) Within Subjects Effects for **Orientation recall: RT**

|                                               | Sum of Squares | df | Mean Square | F     | p     | $\eta^2$ |
|-----------------------------------------------|----------------|----|-------------|-------|-------|----------|
| Distractor                                    | 8427           | 1  | 8427        | 1.939 | 0.174 | 0.063    |
| Residual                                      | 126029         | 29 | 4346        |       |       |          |
| Retro-cue type * Distractor                   | 6784           | 1  | 6784        | 2.556 | 0.121 | 0.081    |
| Residual                                      | 76971          | 29 | 2654        |       |       |          |
| Informativeness * Distractor                  | 1807           | 1  | 1807        | 0.549 | 0.465 | 0.019    |
| Residual                                      | 95526          | 29 | 3294        |       |       |          |
| Retro-cue type * Informativeness * Distractor | 2004           | 1  | 2004        | 0.652 | 0.426 | 0.022    |
| Residual                                      | 89135          | 29 | 3074        |       |       |          |

665

666

D) Within Subjects Effects for **Colour recall: RT**

|                                               | Sum of Squares | df | Mean Square | F     | p     | $\eta^2$ |
|-----------------------------------------------|----------------|----|-------------|-------|-------|----------|
| Distractor                                    | 6517.18        | 1  | 6517.18     | 0.629 | 0.434 | 0.021    |
| Residual                                      | 300276.91      | 29 | 10354.38    |       |       |          |
| Retro-cue type * Distractor                   | 339.93         | 1  | 339.93      | 0.119 | 0.733 | 0.004    |
| Residual                                      | 83020.69       | 29 | 2862.78     |       |       |          |
| Informativeness * Distractor                  | 1762.09        | 1  | 1762.09     | 0.698 | 0.410 | 0.024    |
| Residual                                      | 73178.64       | 29 | 2523.40     |       |       |          |
| Retro-cue type * Informativeness * Distractor | 54.09          | 1  | 54.09       | 0.023 | 0.879 | 0.001    |
| Residual                                      | 66963.22       | 29 | 2309.08     |       |       |          |

667
